# Supplementary material
Source: MDPI journal article supplement (https://www.mdpi.com/2076-3417/9/22/4923)
Supplement: s1 [file s1]

# GeneMANIA report

Created on : 28 June 2018 11:10:56  
Last database update : 13 March 2017 00:00:00  
Application version : 3.6.0

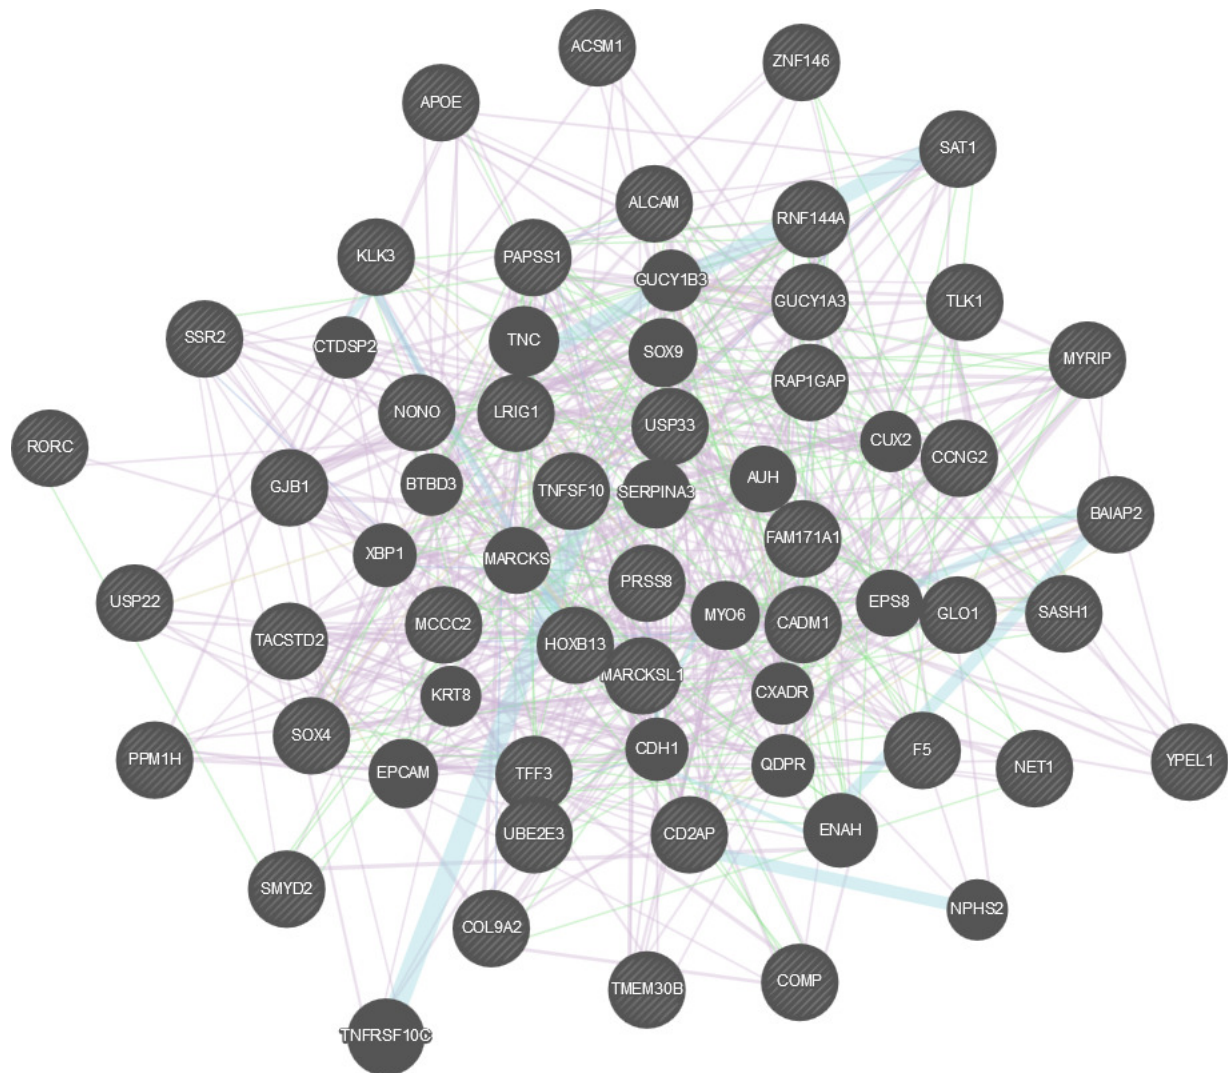

## Networks

- Co-expression
- Pathway
- Genetic Interactions
- Co-localization
- Shared protein domains

## Functions

N/A

# Search parameters

**Organism** Homo sapiens (human)

**Genes** COL9A2 , PRSS8 , RAP1GAP , USP33 , YPEL1 , COMP , PPM1H , SASH1 , TNFSF10 , USP22 , SOX4 , GLO1 , SAT1 , APOE , MCCC2 , CCNG2 , PAPSS1 , KLK3 , RORC , SMYD2 , LRIG1 , NONO , FAM171A1 , RNF144A , HOXB13 , TFF3 , SSR2 , GUCY1A3 , ACSM1 , ZNF146 , GJB1 , MYRIP , ALCAM , UBE2E3 , NET1 , MARCKSL1 , BAIAP2 , TMEM30B , CADM1 , TACSTD2 , CD2AP , TLK1 , F5

**Network weighting** Automatically selected weighting method

**Networks** A

---

Abu-Odeh-Aqeilan-2014 , Agrawal-Sedivy-2010 , Aichem-Groettrup-2012 , Albers-Koegl-2005 , Alexandru-Deshaies-2008 , Alizadeh-Staudt-2000 , Andresen-Flores-Morales-2014 , Arbuckle-Grant-2010 , Arroyo-Aloy-2014 , Arroyo-Aloy-2015

B

---

Bahr-Bowler-2013 , Bailey-Hieter-2015 , Bandyopadhyay-Ideker-2010 , Bantscheff-Drewes-2011 , Barr-Knapp-2009 , Barrios-Rodiles-Wrana-2005 , Behrends-Harper-2010 , Behzadnia-Lührmann-2007 , Bennett-Harper-2010 , Benzinger-Hermeking-2005 , Berggård-James-2006 , Bett-Hay-2013 , Bhatnagar-Attie-2014 , Bild-Nevins-2006 B , BIOGRID-SMALL-SCALE-STUDIES , BIOGRID-SMALL-SCALE-STUDIES , Blandin-Richard-2013 , Blomen-Brummelkamp-2015 , Blomen-Brummelkamp-2015 , Bogachek-Weigel-2014 , Boldrick-Relman-2002 , Bonacci-Soubeyran-2014 , Bouwmeester-Supert-Furga-2004 , Brajenovic-Drewes-2004 , Brehme-Supert-Furga-2009 , Bruderer-Hay-2011 , Burington-Shaughnessy-2008 , Butland-Hayden-2014 , Byron-Humphries-2012

C

---

Cai-Conaway-2007 , Camargo-Brandon-2007 , Campos-Reinberg-2015 , Cao-Chinnaiyan-2014 , Carmon-Liu-2014 , CELL\_MAP , Chen-Brown-2002 , Chen-Ge-2013 , Chen-Huang-2014 , Chen-Zhang-2013 , Christianson-Kopito-2011 , Cloutier-Coulombe-2013 , Colland-Gauthier-2004 , Corominas-Iakoucheva-2014 , Couzens-Gingras-2013 , Cox-Rizzino-2013 , Coyaud-Raught-2015

D

---

Danielsen-Nielsen-2011 , Dart-Wells-2015 , de Hoog-Mann-2004 , Diner-Cristea-2015 , Dobbin-Giordano-2005 , Drissi-Boisvert-2015 , Dyer-Sobral-2010

E

---

Emanuele-Elledge-2011 , Emdal-Olsen-2015 , Ewing-Figeys-2007

F

---

Fenner-Prehn-2010 , Floyd-Pagliarini-2016 , Foerster-Ritter-2013 , Fogeron-Lange-

## F

---

2013 , Foster-Marshall-2013 , Freibaum-Taylor-2010

## G

---

Gabriel-Baumgrass-2016 , Galligan-Howley-2015 , Gao-Reinberg-2012 , Gautier-Hall-2009 , Giannone-Liu-2010 , Glatte-Gstaiger-2009 , Gloeckner-Ueffing-2007 , Goehler-Wanker-2004 , Golebiowski-Hay-2009 , Goudreault-Gingras-2009 , Grant-2010 , Greco-Cristea-2011 , Grossmann-Stelzl-2015 , Guarani-Harper-2014 , Gupta-Pelletier-2015

## H

---

Hanson-Clayton-2014 , Hauri-Gstaiger-2013 , Havrylov-Redowicz-2009 , Havugimana-Emili-2012 , Hayes-Urbé-2012 , Hegele-Stelzl-2012 A , Hegele-Stelzl-2012 B , Hein-Mann-2015 , Hill-Livingston-2014 , HUMANCYC , Humphries-Humphries-2009 , Hutchins-Peters-2010 , Huttlin-Gygi-2015

## I

---

I2D-BIND-Fly2Human , I2D-BIND-Mouse2Human , I2D-BIND-Rat2Human , I2D-BIND-Worm2Human , I2D-BIND-Yeast2Human , I2D-BioGRID-Fly2Human , I2D-BioGRID-Mouse2Human , I2D-BioGRID-Rat2Human , I2D-BioGRID-Worm2Human , I2D-BioGRID-Yeast2Human , I2D-Chen-Pawson-2009-PiwiScreen-Mouse2Human , I2D-Formstecher-Daviet-2005-Embryo-Fly2Human , I2D-Giot-Rothbert-2003-Low-Fly2Human , I2D-INNATEDB-Mouse2Human , I2D-IntAct-Fly2Human , I2D-IntAct-Mouse2Human , I2D-IntAct-Rat2Human , I2D-IntAct-Worm2Human , I2D-IntAct-Yeast2Human , I2D-Krogan-Greenblatt-2006-Core-Yeast2Human , I2D-Krogan-Greenblatt-2006-NonCore-Yeast2Human , I2D-Li-Vidal-2004-CORE-1-Worm2Human , I2D-Li-Vidal-2004-non-core-Worm2Human , I2D-Manual-Mouse2Human , I2D-Manual-Rat2Human , I2D-MGI-Mouse2Human , I2D-MINT-Fly2Human , I2D-MINT-Mouse2Human , I2D-MINT-Rat2Human , I2D-MINT-Worm2Human , I2D-MINT-Yeast2Human , I2D-Ptacek-Snyder-2005-Yeast2Human , I2D-Tarassov-PCA-Yeast2Human , I2D-Tewari-Vidal-2004-TGFb-Worm2Human , I2D-vonMering-Bork-2002-High-Yeast2Human , I2D-vonMering-Bork-2002-Low-Yeast2Human , I2D-vonMering-Bork-2002-Medium-Yeast2Human , I2D-Wang-Orkin-2006-ESmplx-Mouse2Human , I2D-Wang-Orkin-2006-ESmplxlow-Mouse2Human , I2D-Yu-Vidal-2008-GoldStd-Yeast2Human , IMID , Ingham-Pawson-2005 , Innocenti-Brown-2011 , INTERPRO , IREF-BIND , IREF-BIOGRID , IREF-DIP , IREF-HPRD , IREF-INTACT , IREF-MATRIXDB , IREF-MPPI , IREF-PUBMED , IREF-SMALL-SCALE-STUDIES , IREF-SMALL-SCALE-STUDIES

## J

---

Jeronimo-Coulombe-2007 , Jin-Pawson-2004 , Johnson-Kerner-Wichterle-2015 , Johnson-Shoemaker-2003 , Jones-MacBeath-2006 , Joshi-Cristea-2013 , Jäger-Krogan-2011

## K

---

## K

---

Kahle-Zoghbi-2011 , Kaltenbach-Hughes-2007 , Katsogiannou-Rocchi-2014 , Kim-Gygi-2011 , Kim-Major-2015 , Kneissl-Grummt-2003 , Koch-Hermeking-2007 , Kotlyar-Jurisica-2015 , Kristensen-Foster-2012 , Kärblane-Sarmiento-2015 , Kırılı-Görlich-2015

## L

---

Lambert-Gingras-2015 , Lamoliatte-Thibault-2014 , Lau-Ronai-2012 , Lee-Songyang-2011 , Lehner-Sanderson-2004 A , Lehner-Sanderson-2004 B , Leng-Wang-2014 , Leung-Jones-2014 , Li-Chen-2015 , Li-Dorf-2011 A , Li-Dorf-2011 B , Li-Dorf-2014 , Li-Haura-2013 , Lim-Zoghbi-2006 , Lin-Smith-2010 , Lipp-Guthrie-2015 , Liu-Wang-2012 , Llères-Lamond-2010 , Loch-Strickler-2012 , Low-Heck-2014 , Lu-Zhang-2013 , Luo-Elledge-2009

## M

---

Mak-Moffat-2010 , Mallon-McKay-2013 , Malovannaya-Qin-2010 , Markson-Sanderson-2009 , Maréchal-Zou-2014 , Matsumoto-Nakayama-2005 , McCracken-Blencowe-2005 , McFarland-Nussbaum-2008 , Meek-Piwnica-Worms-2004 , Milev-Mouland-2012 , Miyamoto-Sato-Yanagawa-2010 , Murakawa-Landthaler-2015

## N

---

Nakayama-Ohara-2002 , Nakayasu-Adkins-2013 , Napolitano-Meroni-2011 , Narayan-Bennett-2012 , Nathan-Goldberg-2013 , NCI\_NATURE , Neganova-Lako-2011 , Newman-Keating-2003 , Nicholson-Hupp-2014 , Noble-Diehl-2008

## O

---

Oliviero-Cagney-2015 , Olma-Pintard-2009 , Oláh-Ovádi-2011 , Oshikawa-Nakayama-2012 , Ouyang-Gill-2009

## P

---

Panigrahi-Pati-2012 , Papp-Lamia-2015 , Perez-Hernandez-Yáñez-Mó-2013 , Perou-Botstein-1999 , Perou-Botstein-2000 , Persaud-Rotin-2009 , Petschnigg-Stagljar-2014 , PFAM , Phillips-Corn-2013 , Pichlmair-Superti-Furga-2011 , Pichlmair-Superti-Furga-2012 , Pilot-Storck-Goillot-2010 , Povlsen-Choudhary-2012

## R

---

Ramachandran-LaBaer-2004 , Raman-Harper-2015 , Ramaswamy-Golub-2001 , Ravasi-Hayashizaki-2010 , REACTOME , Reinke-Keating-2013 , Reyniers-Taymans-2014 , Richter-Chrzanowska-Lightowers-2010 , Rieger-Chu-2004 , Rolland-Vidal-2014 , Rosenwald-Staudt-2001 , Roth-Zlotnik-2006 , Roux-Burke-2012 , Rowbotham-Mermoud-2011 , Roy-Pardo-2014 , Roy-Parent-2013 , Rual-Vidal-2005 A , Rual-Vidal-2005 B

## S

---

Sang-Jackson-2011 , Sato-Conaway-2004 , Schadt-Shoemaker-2004 , Scholz-Taylor-2016 , Singh-Moore-2012 , Smirnov-Cheung-2009 , So-Colwill-2015 , Soler-López-Aloy-2011 , Sowa-Harper-2009 , Stehling-Lill-2012 , Stehling-Lill-2013 , Stelzl-

## S

---

Wanker-2005 , Stes-Gevaert-2014 , Stuart-Kim-2003 , Suter-Wanker-2013

## T

---

Taipale-Lindquist-2012 , Taipale-Lindquist-2014 , Takahashi-Conaway-2011 , Tarallo-Weisz-2011 , Tatham-Hay-2011 , Teixeira-Gomes-2010 , Thalappilly-Duseti-2008 , Thompson-Luchansky-2014 , Tong-Moran-2014 , Toyoshima-Grandori-2012 , Tsai-Cristea-2012

## U

---

Udeshi-Carr-2012

## V

---

van Wijk-Timmers-2009 , Vandamme-Angrand-2011 , Varjosalo-Gstaiger-2013 , Varjosalo-Supertti-Furga-2013 , Venkatesan-Vidal-2009 , Vermeulen-Mann-2010 , Vinayagam-Wanker-2011 , Virok-Fülöp-2011 , Vizeacoumar-Moffat-2013

## W

---

Wagner-Choudhary-2011 , Wallach-Kramer-2013 , Wan-Emili-2015 , Wang-Balch-2006 , Wang-Cheung-2015 , Wang-He-2008 , Wang-Maris-2006 , Wang-Xu-2015 , Wang-Yang-2011 , Weimann-Stelzl-2013 A , Weimann-Stelzl-2013 B , Weinmann-Meister-2009 , Wen-Wu-2014 , Whisenant-Salomon-2015 , Wilker-Yaffe-2007 , Willingham-Muchowski-2003 , Witt-Labeit-2008 , Wong-O'Bryan-2012 , Woods-Monteiro-2012 , Woodsmith-Sanderson-2012 , Wu-Garvey-2007 , Wu-Li-2007 , Wu-Ma-2012 , Wu-Stein-2010 , Wu-Stein-2010

## X

---

Xiao-Lefkowitz-2007 , Xie-Cong-2013 , Xie-Green-2012 , Xu-Ye-2012

## Y

---

Yang-Chen-2010 , Yatim-Benkirane-2012 , Yu-Chow-2013 , Yu-Vidal-2011

## Z

---

Zanon-Pichler-2013 , Zhang-Shang-2006 , Zhang-Zou-2011 , Zhao-Krug-2005 , Zhao-Yang-2011 , Zhou-Conrads-2004 , Zhou-Hanemann-2016

# Genes

| Gene     | Description                                                                          | Rank |
|----------|--------------------------------------------------------------------------------------|------|
| TMEM30B  | transmembrane protein 30B [Source:HGNC Symbol;Acc:HGNC:27254]                        | N/A  |
| BAIAP2   | BAI1 associated protein 2 [Source:HGNC Symbol;Acc:HGNC:947]                          | N/A  |
| CADM1    | cell adhesion molecule 1 [Source:HGNC Symbol;Acc:HGNC:5951]                          | N/A  |
| PPM1H    | protein phosphatase, Mg2+/Mn2+ dependent 1H [Source:HGNC Symbol;Acc:HGNC:18583]      | N/A  |
| USP22    | ubiquitin specific peptidase 22 [Source:HGNC Symbol;Acc:HGNC:12621]                  | N/A  |
| ACSM1    | acyl-CoA synthetase medium-chain family member 1 [Source:HGNC Symbol;Acc:HGNC:18049] | N/A  |
| TACSTD2  | tumor-associated calcium signal transducer 2 [Source:HGNC Symbol;Acc:HGNC:11530]     | N/A  |
| RAP1GAP  | RAP1 GTPase activating protein [Source:HGNC Symbol;Acc:HGNC:9858]                    | N/A  |
| SASH1    | SAM and SH3 domain containing 1 [Source:HGNC Symbol;Acc:HGNC:19182]                  | N/A  |
| SOX4     | SRY-box 4 [Source:HGNC Symbol;Acc:HGNC:11200]                                        | N/A  |
| MCCC2    | methylcrotonoyl-CoA carboxylase 2 [Source:HGNC Symbol;Acc:HGNC:6937]                 | N/A  |
| SMYD2    | SET and MYND domain containing 2 [Source:HGNC Symbol;Acc:HGNC:20982]                 | N/A  |
| YPEL1    | yippee like 1 [Source:HGNC Symbol;Acc:HGNC:12845]                                    | N/A  |
| TFF3     | trefoil factor 3 [Source:HGNC Symbol;Acc:HGNC:11757]                                 | N/A  |
| MYRIP    | myosin VIIA and Rab interacting protein [Source:HGNC Symbol;Acc:HGNC:19156]          | N/A  |
| COL9A2   | collagen type IX alpha 2 [Source:HGNC Symbol;Acc:HGNC:2218]                          | N/A  |
| NET1     | neuroepithelial cell transforming 1 [Source:HGNC Symbol;Acc:HGNC:14592]              | N/A  |
| MARCKSL1 | MARCKS like 1 [Source:HGNC Symbol;Acc:HGNC:7142]                                     | N/A  |
| RNF144A  | ring finger protein 144A [Source:HGNC Symbol;Acc:HGNC:20457]                         | N/A  |
| RORC     | RAR related orphan receptor C [Source:HGNC Symbol;Acc:HGNC:10260]                    | N/A  |
| COMP     | cartilage oligomeric matrix protein [Source:HGNC Symbol;Acc:HGNC:2227]               | N/A  |

| Gene      | Description                                                                                | Rank |
|-----------|--------------------------------------------------------------------------------------------|------|
| F5        | coagulation factor V [Source:HGNC Symbol;Acc:HGNC:3542]                                    | N/A  |
| FAM171A1  | family with sequence similarity 171 member A1 [Source:HGNC Symbol;Acc:HGNC:23522]          | N/A  |
| TLK1      | tousled like kinase 1 [Source:HGNC Symbol;Acc:HGNC:11841]                                  | N/A  |
| LRIG1     | leucine rich repeats and immunoglobulin like domains 1 [Source:HGNC Symbol;Acc:HGNC:17360] | N/A  |
| CCNG2     | cyclin G2 [Source:HGNC Symbol;Acc:HGNC:1593]                                               | N/A  |
| ALCAM     | activated leukocyte cell adhesion molecule [Source:HGNC Symbol;Acc:HGNC:400]               | N/A  |
| KLK3      | kallikrein related peptidase 3 [Source:HGNC Symbol;Acc:HGNC:6364]                          | N/A  |
| PAPSS1    | 3'-phosphoadenosine 5'-phosphosulfate synthase 1 [Source:HGNC Symbol;Acc:HGNC:8603]        | N/A  |
| USP33     | ubiquitin specific peptidase 33 [Source:HGNC Symbol;Acc:HGNC:20059]                        | N/A  |
| GUCY1A3   | guanylate cyclase 1, soluble, alpha 3 [Source:HGNC Symbol;Acc:HGNC:4685]                   | N/A  |
| SAT1      | spermidine/spermine N1-acetyltransferase 1 [Source:HGNC Symbol;Acc:HGNC:10540]             | N/A  |
| UBE2E3    | ubiquitin conjugating enzyme E2 E3 [Source:HGNC Symbol;Acc:HGNC:12479]                     | N/A  |
| APOE      | apolipoprotein E [Source:HGNC Symbol;Acc:HGNC:613]                                         | N/A  |
| GLO1      | glyoxalase I [Source:HGNC Symbol;Acc:HGNC:4323]                                            | N/A  |
| GJB1      | gap junction protein beta 1 [Source:HGNC Symbol;Acc:HGNC:4283]                             | N/A  |
| SSR2      | signal sequence receptor subunit 2 [Source:HGNC Symbol;Acc:HGNC:11324]                     | N/A  |
| CD2AP     | CD2-associated protein [Source:HGNC Symbol;Acc:HGNC:14258]                                 | N/A  |
| HOXB13    | homeobox B13 [Source:HGNC Symbol;Acc:HGNC:5112]                                            | N/A  |
| ZNF146    | zinc finger protein 146 [Source:HGNC Symbol;Acc:HGNC:12931]                                | N/A  |
| TNFSF10   | tumor necrosis factor superfamily member 10 [Source:HGNC Symbol;Acc:HGNC:11925]            | N/A  |
| PRSS8     | protease, serine 8 [Source:HGNC Symbol;Acc:HGNC:9491]                                      | N/A  |
| NONO      | non-POU domain containing, octamer-binding [Source:HGNC Symbol;Acc:HGNC:7871]              | N/A  |
| TNFRSF10C | tumor necrosis factor receptor superfamily member 10c [Source:HGNC Symbol;Acc:HGNC:11906]  | 1    |
| ENAH      | enabled homolog (Drosophila) [Source:HGNC Symbol;Acc:HGNC:18271]                           | 2    |

| Gene     | Description                                                                              | Rank |
|----------|------------------------------------------------------------------------------------------|------|
| TNC      | tenascin C [Source:HGNC Symbol;Acc:HGNC:5318]                                            | 3    |
| EPCAM    | epithelial cell adhesion molecule [Source:HGNC Symbol;Acc:HGNC:11529]                    | 4    |
| SERPINA3 | serpin family A member 3 [Source:HGNC Symbol;Acc:HGNC:16]                                | 5    |
| SOX9     | SRY-box 9 [Source:HGNC Symbol;Acc:HGNC:11204]                                            | 6    |
| MYO6     | myosin VI [Source:HGNC Symbol;Acc:HGNC:7605]                                             | 7    |
| MARCKS   | myristoylated alanine rich protein kinase C substrate [Source:HGNC Symbol;Acc:HGNC:6759] | 8    |
| EPS8     | epidermal growth factor receptor pathway substrate 8 [Source:HGNC Symbol;Acc:HGNC:3420]  | 9    |
| AUH      | AU RNA binding protein/enoyl-CoA hydratase [Source:HGNC Symbol;Acc:HGNC:890]             | 10   |
| XBP1     | X-box binding protein 1 [Source:HGNC Symbol;Acc:HGNC:12801]                              | 11   |
| CDH1     | cadherin 1 [Source:HGNC Symbol;Acc:HGNC:1748]                                            | 12   |
| QDPR     | quinoid dihydropteridine reductase [Source:HGNC Symbol;Acc:HGNC:9752]                    | 13   |
| CXADR    | coxsackie virus and adenovirus receptor [Source:HGNC Symbol;Acc:HGNC:2559]               | 14   |
| BTBD3    | BTB domain containing 3 [Source:HGNC Symbol;Acc:HGNC:15854]                              | 15   |
| CTDSP2   | CTD small phosphatase 2 [Source:HGNC Symbol;Acc:HGNC:17077]                              | 16   |
| GUCY1B3  | guanylate cyclase 1, soluble, beta 3 [Source:HGNC Symbol;Acc:HGNC:4687]                  | 17   |
| NPHS2    | NPHS2 podocin [Source:HGNC Symbol;Acc:HGNC:13394]                                        | 18   |
| CUX2     | cut like homeobox 2 [Source:HGNC Symbol;Acc:HGNC:19347]                                  | 19   |
| KRT8     | keratin 8 [Source:HGNC Symbol;Acc:HGNC:6446]                                             | 20   |



# Networks

|                                                                                                                                                                                                                                                             |               |
|-------------------------------------------------------------------------------------------------------------------------------------------------------------------------------------------------------------------------------------------------------------|---------------|
| <b>Co-expression</b>                                                                                                                                                                                                                                        | <b>92.30%</b> |
| <b>Ramaswamy-Golub-2001</b>                                                                                                                                                                                                                                 | <b>16.97%</b> |
| Multiclass cancer diagnosis using tumor gene expression signatures. Ramaswamy et al (2001). <i>Proc Natl Acad Sci U S A</i><br>Co-expression with 275,113 interactions from supplementary material                                                          |               |
| <b>Wang-Maris-2006</b>                                                                                                                                                                                                                                      | <b>10.22%</b> |
| Integrative genomics identifies distinct molecular classes of neuroblastoma and shows that multiple genes are targeted by regional alterations in DNA copy number. Wang et al (2006). <i>Cancer Res</i><br>Co-expression with 264,023 interactions from GEO |               |
| <b>Bild-Nevins-2006 B</b>                                                                                                                                                                                                                                   | <b>9.09%</b>  |
| Oncogenic pathway signatures in human cancers as a guide to targeted therapies. Bild et al (2006). <i>Nature</i><br>Co-expression with 280,683 interactions from GEO                                                                                        |               |
| <b>Rieger-Chu-2004</b>                                                                                                                                                                                                                                      | <b>9.09%</b>  |
| Toxicity from radiation therapy associated with abnormal transcriptional responses to DNA damage. Rieger et al (2004). <i>Proc Natl Acad Sci U S A</i><br>Co-expression with 259,974 interactions from GEO                                                  |               |
| <b>Chen-Brown-2002</b>                                                                                                                                                                                                                                      | <b>8.09%</b>  |
| Gene expression patterns in human liver cancers. Chen et al (2002). <i>Mol Biol Cell</i><br>Co-expression with 282,241 interactions from supplementary material                                                                                             |               |
| <b>Wang-Cheung-2015</b>                                                                                                                                                                                                                                     | <b>7.51%</b>  |
| Genetic variation in insulin-induced kinase signaling. Wang et al (2015). <i>Mol Syst Biol</i><br>Co-expression with 411,047 interactions from GEO                                                                                                          |               |
| <b>Burington-Shaughnessy-2008</b>                                                                                                                                                                                                                           | <b>5.56%</b>  |
| Tumor cell gene expression changes following short-term in vivo exposure to single agent chemotherapeutics are related to survival in multiple myeloma. Burington et al (2008). <i>Clin Cancer Res</i><br>Co-expression with 290,538 interactions from GEO  |               |
| <b>Mallon-McKay-2013</b>                                                                                                                                                                                                                                    | <b>5.38%</b>  |
| StemCellDB: the human pluripotent stem cell database at the National Institutes of Health. Mallon et al (2013). <i>Stem Cell Res</i><br>Co-expression with 585,265 interactions from GEO                                                                    |               |
| <b>Roth-Zlotnik-2006</b>                                                                                                                                                                                                                                    | <b>4.72%</b>  |
| Gene expression analyses reveal molecular relationships among 20 regions of the human CNS. Roth et al (2006). <i>Neurogenetics</i><br>Co-expression with 669,062 interactions from GEO                                                                      |               |
| <b>Dobbin-Giordano-2005</b>                                                                                                                                                                                                                                 | <b>3.73%</b>  |
| Interlaboratory comparability study of cancer gene expression analysis using oligonucleotide microarrays. Dobbin et al (2005). <i>Clin Cancer Res</i><br>Co-expression with 444,931 interactions from GEO                                                   |               |
| <b>Perou-Botstein-1999</b>                                                                                                                                                                                                                                  | <b>2.44%</b>  |
| Distinctive gene expression patterns in human mammary epithelial cells and breast cancers. Perou et al (1999). <i>Proc Natl Acad Sci U S A</i><br>Co-expression with 65,069 interactions from supplementary material                                        |               |

|                                                                                                                                                            |        |
|------------------------------------------------------------------------------------------------------------------------------------------------------------|--------|
| <b>Co-expression</b>                                                                                                                                       | 92.30% |
| Perou-Botstein-2000                                                                                                                                        | 2.14%  |
| Molecular portraits of human breast tumours. Perou et al (2000). <i>Nature</i>                                                                             |        |
| Co-expression with 185,068 interactions from supplementary material                                                                                        |        |
| Innocenti-Brown-2011                                                                                                                                       | 2.05%  |
| Identification, replication, and functional fine-mapping of expression quantitative trait loci in primary human liver tissue.                              |        |
| Innocenti et al (2011). <i>PLoS Genet</i>                                                                                                                  |        |
| Co-expression with 603,765 interactions from GEO                                                                                                           |        |
| Smirnov-Cheung-2009                                                                                                                                        | 1.54%  |
| Genetic analysis of radiation-induced changes in human gene expression. Smirnov et al (2009). <i>Nature</i>                                                |        |
| Co-expression with 461,500 interactions from GEO                                                                                                           |        |
| Wu-Garvey-2007                                                                                                                                             | 1.19%  |
| The effect of insulin on expression of genes and biochemical pathways in human skeletal muscle. Wu et al (2007). <i>Endocrine</i>                          |        |
| Co-expression with 267,109 interactions from GEO                                                                                                           |        |
| Rosenwald-Staudt-2001                                                                                                                                      | 0.76%  |
| Relation of gene expression phenotype to immunoglobulin mutation genotype in B cell chronic lymphocytic leukemia. Rosenwald et al (2001). <i>J Exp Med</i> |        |
| Co-expression with 114,694 interactions from supplementary material                                                                                        |        |
| Bahr-Bowler-2013                                                                                                                                           | 0.72%  |
| Peripheral blood mononuclear cell gene expression in chronic obstructive pulmonary disease. Bahr et al (2013). <i>Am J Respir Cell Mol Biol</i>            |        |
| Co-expression with 274,949 interactions from GEO                                                                                                           |        |
| Alizadeh-Staudt-2000                                                                                                                                       | 0.65%  |
| Distinct types of diffuse large B-cell lymphoma identified by gene expression profiling. Alizadeh et al (2000). <i>Nature</i>                              |        |
| Co-expression with 90,336 interactions from supplementary material                                                                                         |        |
| Noble-Diehl-2008                                                                                                                                           | 0.44%  |
| Regional variation in gene expression in the healthy colon is dysregulated in ulcerative colitis. Noble et al (2008). <i>Gut</i>                           |        |
| Co-expression with 661,539 interactions from GEO                                                                                                           |        |
| <b>Pathway</b>                                                                                                                                             | 4.61%  |
| NCI_NATURE                                                                                                                                                 | 4.61%  |
| Pathway with 10,122 interactions from Pathway Commons                                                                                                      |        |
| <b>Genetic Interactions</b>                                                                                                                                | 1.97%  |
| Lin-Smith-2010                                                                                                                                             | 1.97%  |
| A genome-wide map of human genetic interactions inferred from radiation hybrid genotypes. Lin et al (2010). <i>Genome Res</i>                              |        |
| Genetic Interactions with 4,820,370 interactions from supplementary material                                                                               |        |
| <b>Co-localization</b>                                                                                                                                     | 0.82%  |
| Johnson-Shoemaker-2003                                                                                                                                     | 0.82%  |
| Genome-wide survey of human alternative pre-mRNA splicing with exon junction microarrays. Johnson et al (2003). <i>Science</i>                             |        |
| Co-localization with 426,332 interactions from GEO                                                                                                         |        |
| <b>Shared protein domains</b>                                                                                                                              | 0.30%  |

|                               |       |
|-------------------------------|-------|
| <b>Shared protein domains</b> | 0.30% |
|-------------------------------|-------|

---

|      |       |
|------|-------|
| PFAM | 0.30% |
|------|-------|

Shared protein domains with 457,054 interactions from Pfam
